# Supplementary material for: A flexible and robust dual-network supramolecular elastic film with solvent resistance and brilliant structural colors
Source: Royal Society of Chemistry journal article supplement (doi:10.1039/c9nj02308a), 2019-01-01
Supplement: c9nj02308a1.pdf [file c9nj02308a1.pdf]

## Supporting Information

for *New Journal of Chemistry*

### **Flexible and robust dual-network supramolecular elastomer with solvent resistance and brilliant structural colors**

Jia Wu, Wenbin Niu, Shufen Zhang\*, Suli Wu, Wei Ma, Bingtao Tang

## 1. Fourier Transform Infrared Spectroscopy (FTIR)

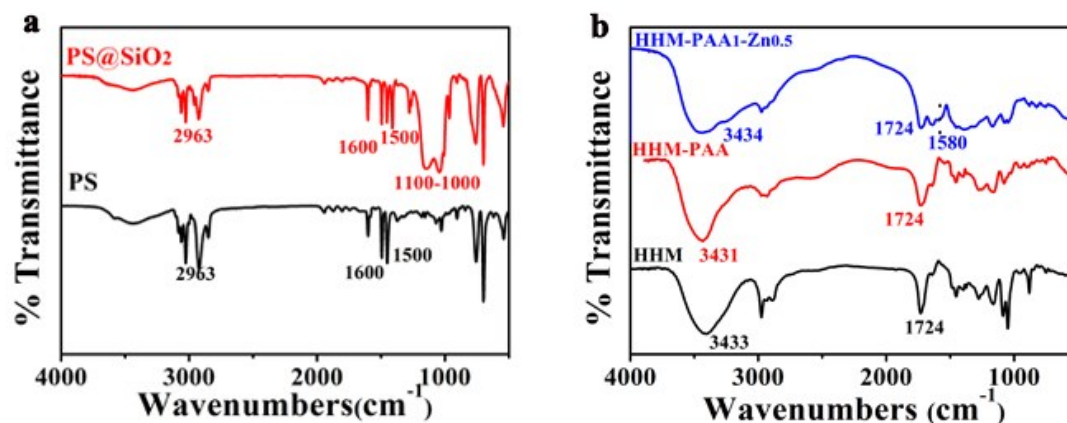

Figure S1 Fourier transform infrared spectra for (a) PS and PS@SiO<sub>2</sub> nanospheres and (b) HHM copolymer, HHM-PAA composite and HHM-PAA<sub>1</sub>-Zn<sub>0.5</sub> supramolecular elastomer.

## 2. Thermal analysis

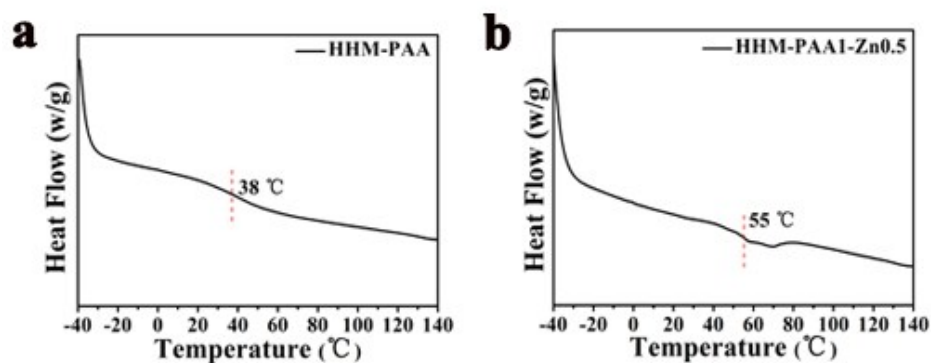

Figure S2 Differential scanning calorimetry analysis for (a) HHM-PAA composite, (b) HHM-PAA<sub>1</sub>-Zn<sub>0.5</sub> supramolecular elastic material.

## 3. SEM images of the PS and the PS@SiO<sub>2</sub> nanospheres

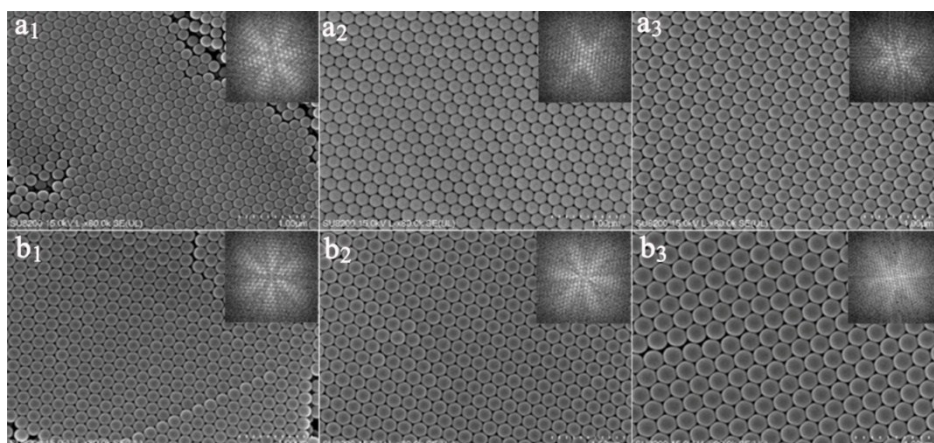

Figure S3 SEM images of the PS nanospheres with diameters of (a<sub>1</sub>) 150 nm, (a<sub>2</sub>) 178 nm, and (a<sub>3</sub>) 193 nm. SEM images of the PS@SiO<sub>2</sub> nanospheres with diameters of (b<sub>1</sub>) 178 nm, (b<sub>2</sub>) 205 nm, and (b<sub>3</sub>) 237 nm. Corresponding FFT power spectra were displayed at the top right-hand corner of each figure.

#### 4. TEM images of the PS@SiO<sub>2</sub> nanospheres

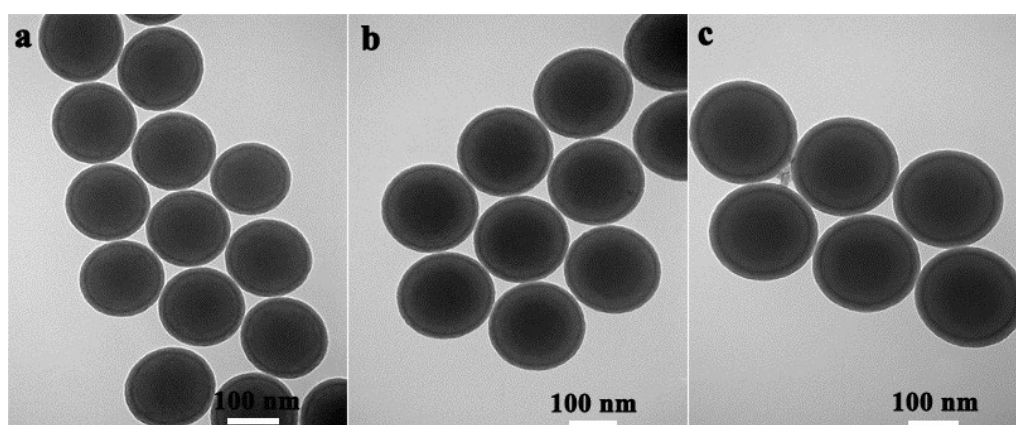

Figure S4 TEM images of the PS@SiO<sub>2</sub> nanospheres with diameters of (a) 178 nm, (b) 205 nm, and (c) 237 nm.

#### 5. Energy dispersive X-ray spectroscopy(EDX)

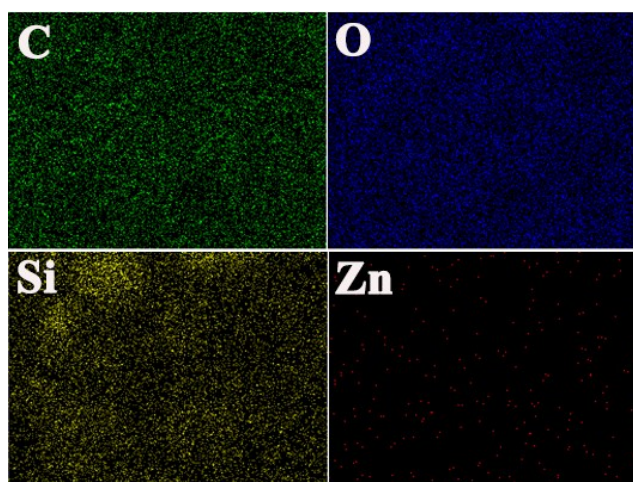

Figure S5 Energy dispersive X-ray (EDX) scans of green HHM-PAA<sub>1</sub>-Zn<sub>0.5</sub> structural color film cross-sectional area. The HHM-PAA<sub>1</sub>-Zn<sub>0.5</sub> structural color film show four elements: C, O, Si, Zn. Area scans of the nearby regions confirm uniformity.

#### 6. Optical photograph of the PS@SiO<sub>2</sub> colloidal photonic crystals

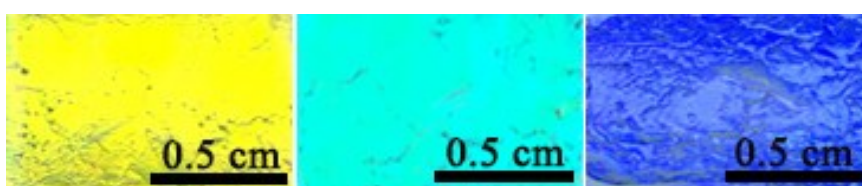

Figure S6 Optical photograph of the PS@SiO<sub>2</sub> photonic crystals with diameters of 237 nm, 205 nm and 178 nm from left to right.

#### 7. Reflection spectra of the PS@SiO<sub>2</sub> photonic crystals

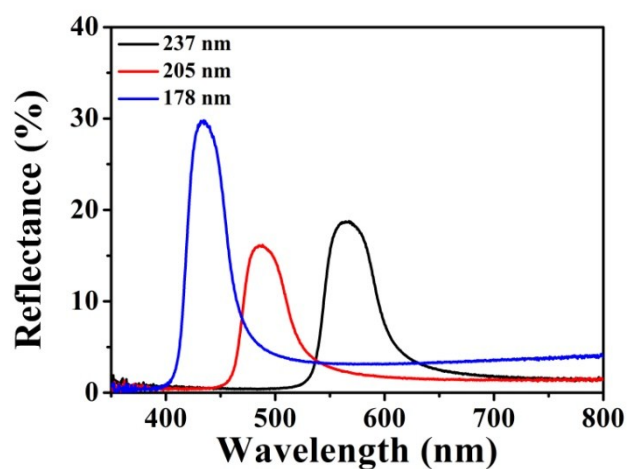

Figure S7 The reflection spectras of the PS@SiO<sub>2</sub> photonic crystals with diameters of

237 nm, 205 nm and 178 nm.

### 8. Cross-sectional SEM images of red and blue HHM-PAA<sub>1</sub>-Zn<sub>0.5</sub> structural color films

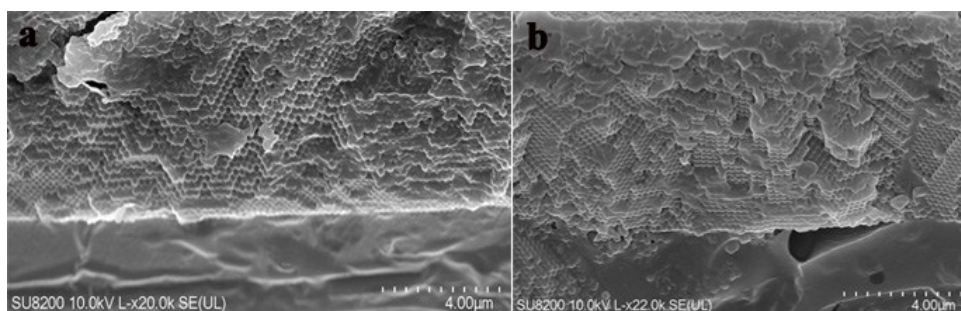

Figure S8 SEM images of the red (a) and blue (b) structural color films.

### 9. SEM image of surface section of the green structural color film after loading-unloading for 100 cycles

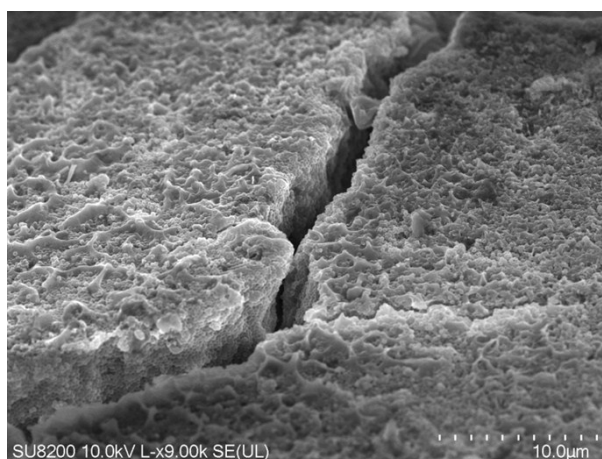

Figure S9 SEM image of the surface section of the green HHM-PAA<sub>1</sub>-Zn<sub>0.5</sub> structural color film (after loading-unloading for 100 cycles, the film was promptly frozen by liquid nitrogen, and structural color film was promptly coated with palladium for 45 s to capture the surface section with scanning electron microscopy).

### 10. The effective refractive index and calculation of the reflection peaks of the red, green and blue structural color films

Bragg's Laws is as follows:

$$\lambda_{max} = (8/3)^{1/2} D (n_{eff}^2 - \sin^2 \theta)^{1/2} \dots\dots\dots ①$$

$$n_{eff}^2 = \sum_{i=1}^n X_i^2 Y_i = n_i^2 \phi_i \dots\dots\dots ②$$

$$n_{PS} = 1.59 \quad n_{SiO2} = 1.46 \quad \phi = 0.74$$

$$n_{sphere} = n_{PS} \frac{V_{PS}}{V} + n_{SiO2} \frac{V_{SiO2}}{V} \dots\dots\dots ③$$

$V = V_{PS} + V_{SiO2}$        $V_{PS}$  and  $V_{SiO2}$  are the volumes of PS and SiO<sub>2</sub> spheres

$$n_{eff} = \left( n_{PS} \frac{V_{PS}}{V} + n_{SiO2} \frac{V_{SiO2}}{V} \right)^2 \times 0.74 + n_{polymer}^2 \times 0.26$$

Table. S1 Parameters of the red, green and blue HHM-PAA<sub>1</sub>-Zn<sub>0.5</sub> structural color films

|       | $n_{eff}$ | D   | $\sin \theta$ |
|-------|-----------|-----|---------------|
| blue  | 1.7074    | 178 | 0.03          |
| green | 1.7128    | 205 | 0.03          |
| red   | 1.7009    | 237 | 0.03          |

$n_{eff}$  is the effective refractive index of the HHM-PAA<sub>1</sub>-Zn<sub>0.5</sub> structural color films

D is the diameter of the nanoparticles

$\theta$  is the angle between the incident light and the reflective surface

Table. S2 The calculated value and measured value of the reflection wavelengths of the red, green and blue HHM-PAA<sub>1</sub>-Zn<sub>0.5</sub> structural color films

|       | Calculated value | Measured value |
|-------|------------------|----------------|
| blue  | 493              | 489            |
| green | 565              | 544            |
| red   | 654              | 634            |



**11. Digital photo of the red HHM-PAA<sub>1</sub>-Zn<sub>0.5</sub> structural color films after stretching**

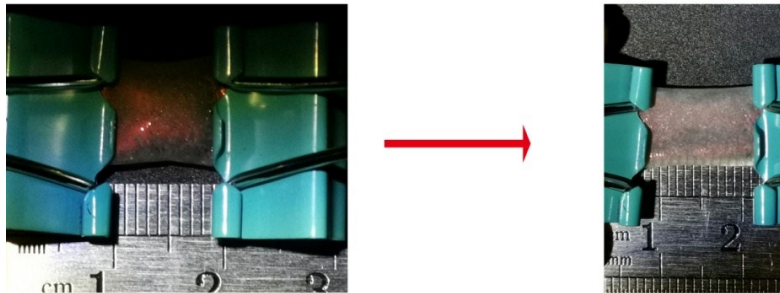

Figure S10 Digital photo of the red HHM-PAA<sub>1</sub>-Zn<sub>0.5</sub> structural color films at a strain of 44% of the original state.

**12. SEM image of the green HHM-PAA<sub>1</sub>-Zn<sub>0.5</sub> structural color film after compression fatigue**

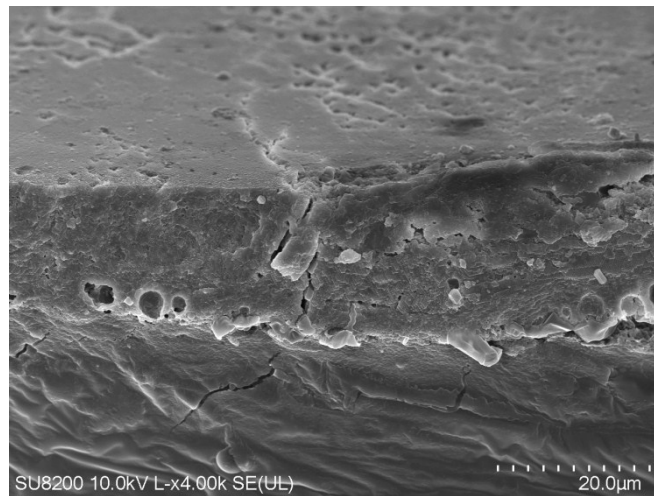

Figure S11 SEM image of the green structural color film after compression fatigue.

**13. Self-recovery of compression mode of the green structural color film**

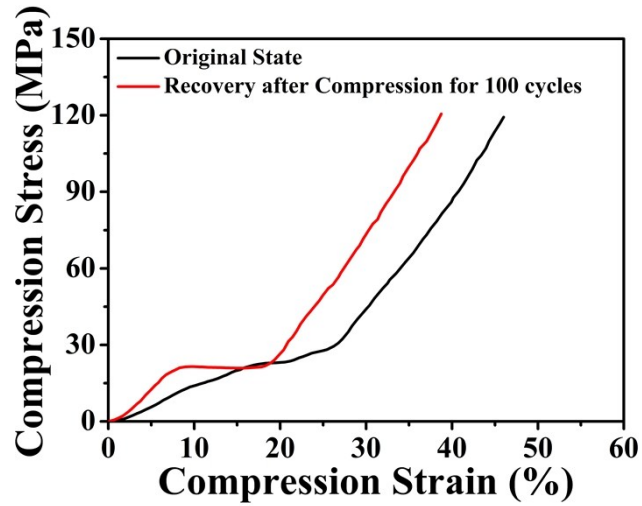

Figure S12 The compression stress of original state (black line), The compression stress was measured after compression for 100 cycles at a rest for 5 min (pressure= 119 MPa).

**14. Reflection spectra of the original state and the green structural color film which was placed in saturated water vapor**

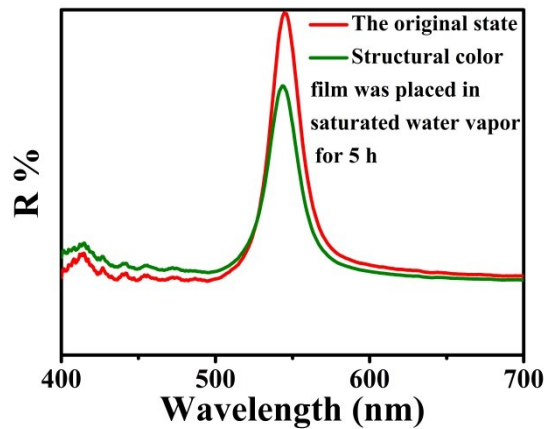

Figure S13 Reflection spectra of the green structural color film (red line); The green structural color film was placed in saturated water vapor for 5 h (green line).
